# Supplementary material
Source: PubMed Central journal article supplement (PMC4380640)
Supplement: NIHMS668103-supplement.pdf [file NIHMS668103-supplement.pdf]

## Supplemental Material

### Participation of proteasome-ubiquitin protein degradation in autophagy and the activation of AMP-activated protein kinase

Shaoning Jiang<sup>1</sup>, Dae Won Park<sup>1, 2</sup>, Yong Gao<sup>1</sup>, Saranya Ravi<sup>3, 4</sup>, Victor Darley-Usmar<sup>3,4</sup>, Edward Abraham<sup>5</sup> and Jaroslaw W. Zmijewski<sup>1,4</sup>

### Supplemental Figure legend

**Supplemental Figure 1. (A)** Peritoneal macrophages were incubated with MG132 (0 or 10  $\mu$ M) for 30 minutes followed by inclusion of CHX (350  $\mu$ M) for indicated times. Representative Western blots and quantitative data show the amount of AMPK and  $\beta$ -actin. Mean  $\pm$  SD,  $n = 3$ , \*  $P < 0.05$ , \*\*  $P < 0.001$ , compared to untreated. **(B)** The extent of pT172-AMPK, total AMPK, Ubiquitin-protein conjugates and  $\beta$ -actin was determined in HEK 293. Representative Western blots show three sets of cell lysates obtained from control (vector) or after Ubiquitin expression for 18 hours. Mean  $\pm$  SD,  $n = 3$ .

**A**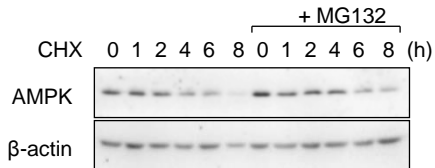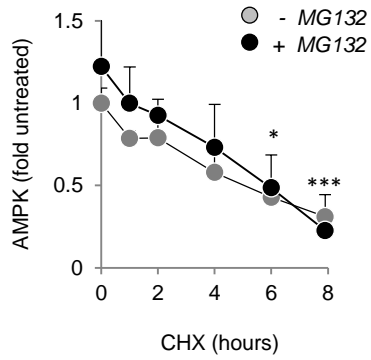**B**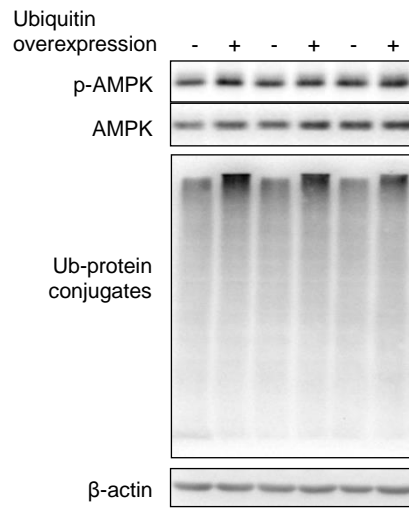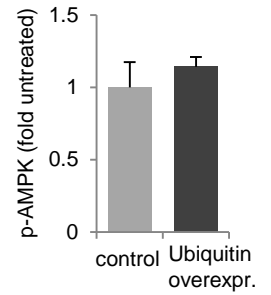

Supplemental Figure 1
